# Supplementary material for: Expression and Functional Analysis of the Argonaute Protein of Thermus thermophilus (TtAgo) in E. coli BL21(DE3)
Source: MDPI journal article supplement (doi:10.3390/biom11040524), 2021-03-31
Supplement: s1 [file s1]

## Supplementary Information

### Expression and functional analysis of the argonaute protein of *Thermus thermophilus* (TtAgo) in *E. coli* BL21(DE3)

Jiani Xing, Lixia Ma, Xinzhen Cheng, Jinrong Ma, Ruyu Wang, Kun Xu, Joe S. Mymryk and Zhiying Zhang

#### Inventory of Supplemental Information

Figure S1. Full-length agarose gel electrophoresis result of pET28a-TtAgo plasmid with different treatments, related to Figure 3A in the revised manuscript.

Figure S2. Full-length agarose gel electrophoresis result of pET28a plasmid with different treatments, related to Figure 3B in the revised manuscript.

Figure S3. Full-length agarose gel electrophoresis result of pET28a-TtAgo plasmid with different treatments, related to Figure 3C in the revised manuscript.

Figure S4. Linear representation of the 4 domains and 2 linkers of the TtAgo protein.

Figure S5. Full-length western blotting images of TtAgo and TtAgo mutant protein expression in BL21(DE3), related to Figure 9D in the revised manuscript.

Figure S6. Full-length western blotting image of TtAgo and TtAgo mutant protein expression in DH5 $\alpha$ , related to Figure 10B in the revised manuscript.

Figure S7. Protein structural simulation figures of the rest of the TtAgo mutants.

Table S1. Primers used in this experiment

Table S2. Error-prone PCR reaction system

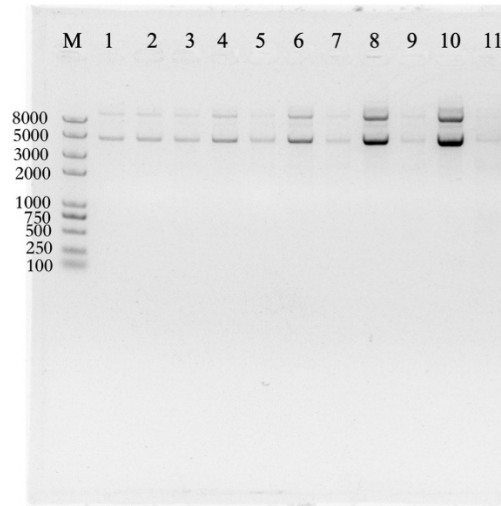

**Figure S1.** Full-length agarose gel electrophoresis result of pET28a-TtAgo plasmid with different treatments, related to Figure 3A in the revised manuscript. Agarose gel was imaged with Gel Imager (MicroChem, DNR) with 100 ms exposure time. Photoshop was used to add the label of molecular size markers and lane number.

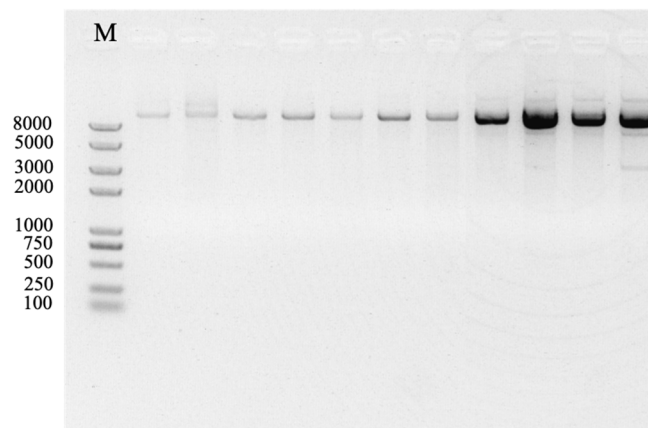

**Figure S2.** Full-length agarose gel electrophoresis result of pET28a plasmid with different treatments, related to Figure 3B in the revised manuscript. Agarose gel was imaged with Gel Imager (MicroChem, DNR) with 100 ms exposure time. Photoshop was used to add the label of molecular size markers marker.

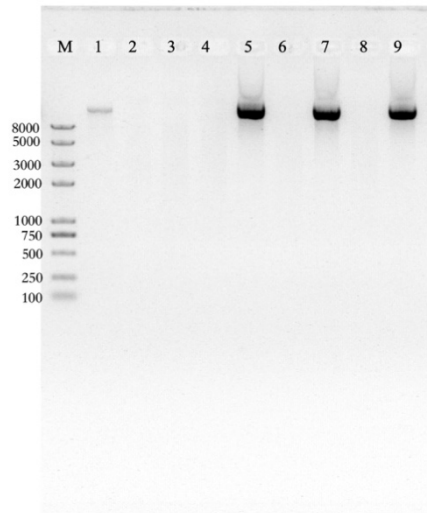

**Figure S3.** Full-length agarose gel electrophoresis result of pET28a-TtAgo plasmid with different treatments, related to Figure 3C in the revised manuscript. Agarose gel was imaged with Gel Imager (MicroChem, DNR) with 100 ms exposure time. Photoshop was used to add the label of molecular size markers and lane number.

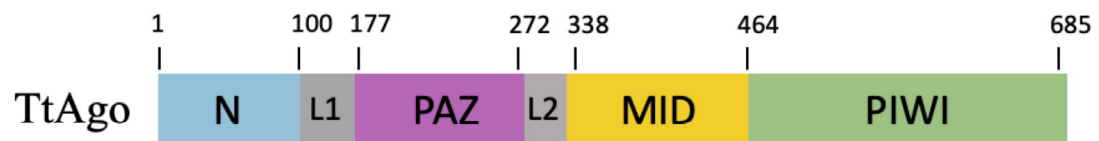

**Figure S4.** Linear representation of the 4 domains and 2 linkers of the TtAgo protein.

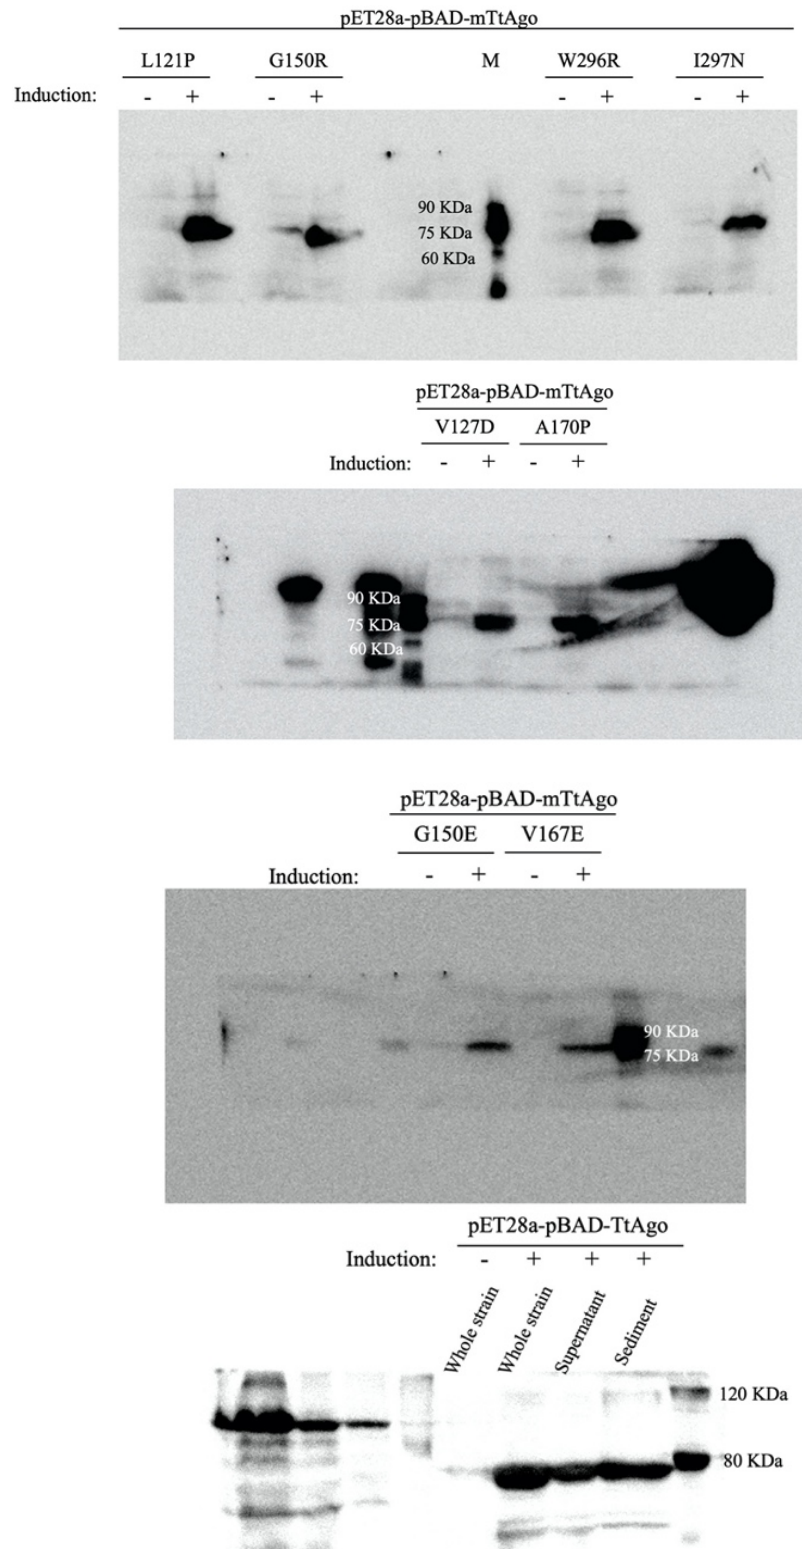

**Figure S5.** TtAgo and TtAgo mutant protein expression in BL21(DE3), related to Figure 9D in the revised manuscript. Induced (labeled as “+”) and not induced (labeled as “-”) cells from experiment shown on Fig. 9D were lysed and loaded on 10% SDS-PAGE gel followed by western blotting with anti-His antibody. The proteins were induced by arabinose of final concentration to 10 mM and with

a 6\*His-tag on the N terminus. TtAgo wild type protein and TtAgo mutant protein were imaged with 1 minute exposure time with ECL Western HRP substrate (Advansta) on a Fluorescent gel imaging system (MicroChem, DNR) and the samples were derived from the same experiment and that blots were processed in parallel. PowerPoint was used to add the label of molecular size markers and samples.

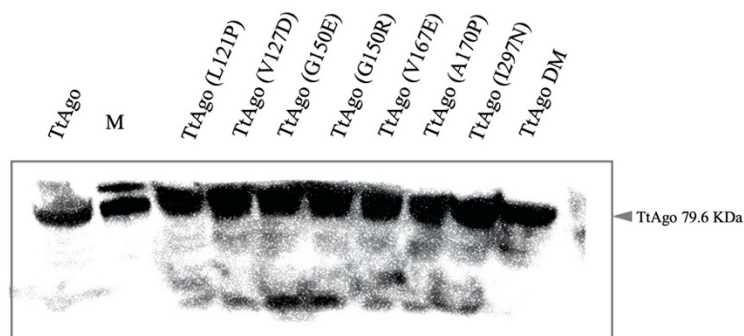

Figure S6. Full-length western blotting image of TtAgo and TtAgo mutant protein expression in DH5 $\alpha$ , related to Figure 10B. Induced cells from experiment shown on Fig. 10B were lysed and loaded on 10% SDS-PAGE gel followed by western blotting with anti-His antibody. The proteins were induced by arabinose of final concentration to 10 mM and with a 6\*His-tag on the N terminus. TtAgo wild type protein and TtAgo mutant protein were imaged with 15 seconds exposure time with ECL Western HRP substrate (Advansta) on a Fluorescent gel imaging system (MicroChem, DNR) and the samples were derived from the same experiment and that blots were processed in parallel. PowerPoint was used to add the label of molecular size markers and samples.

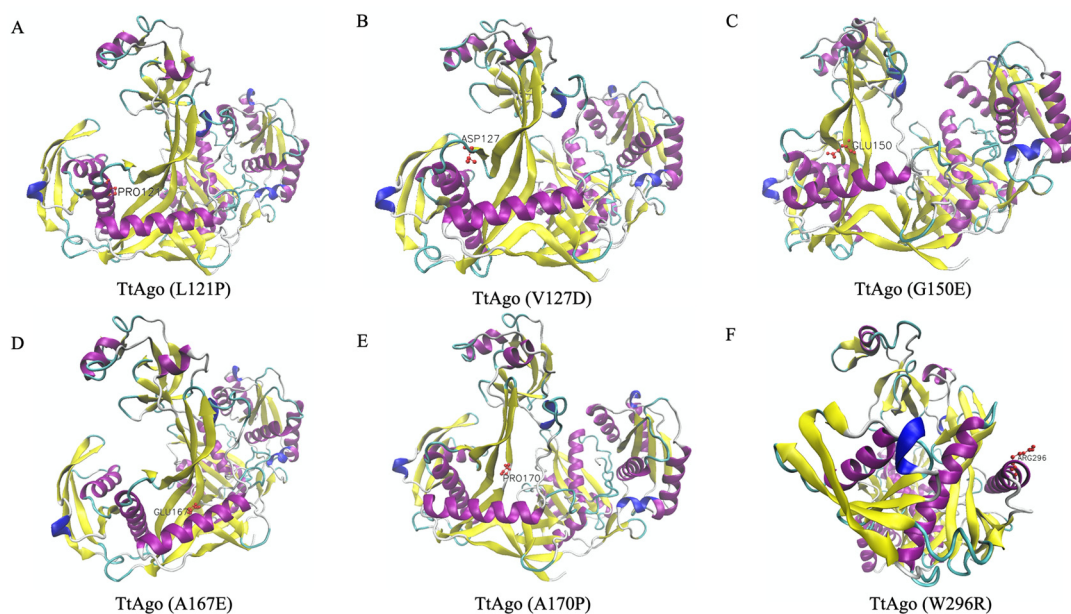

Figure S7. Protein structural simulation figures of the rest of the TtAgo mutants. (A) TtAgo (L121P); (B) TtAgo (V127D); (C) TtAgo (G150E); (D) TtAgo (A167E); (E) TtAgo (A170P); (F) TtAgo

(W296R). The figures were drawn in newcartoon method and colored by secondary structure, with alpha helix indicated in purple, beta-sheet in yellow and amino acids colored in CPK style.

**Table S1.** Primers used in this experiment

| Primer name                                               | Sequence (5'-3')                                            |
|-----------------------------------------------------------|-------------------------------------------------------------|
| <i>Bgl</i> II-araC-R                                      | caAGATCTCCCCGAAAAGTGCC                                      |
| <i>Xba</i> I-pBAD-R                                       | tgcTCTAGAGAATTCCCAAAAAA                                     |
| <i>Eco</i> RI- <i>Xba</i> I del-F                         | ccgGAATTCAATAATTTTGTTTAACTTTAAGAAG                          |
| <i>Nde</i> I- <i>Xba</i> I del-R                          | ggaattcCATATGGCTGCCGCGCGGCACCAG                             |
| <i>Sal</i> I-Tt-F                                         | ggcGTCGACGGACCCGGGAG                                        |
| <i>Hind</i> III- <i>Xba</i> I- <i>Spe</i> I-Tt-R(del TAA) | cccAAGCTTtgcTCTAGAataaggACTAGTcc<br>GTGATGGTGTGATGGTGTATGAA |
| <i>Spe</i> I-gsg link-fab1-F                              | cggACTAGTGGGTTCTGGCATGGGTTTTCTTTCCGG<br>TAAGC               |
| <i>Xba</i> I-fab1-R                                       | cggTCTAGATTATTTTCAGTTCGAGTTCGTTC                            |
| FabIG93V-overlap-F                                        | GTACACTCTATTGTTTTTGCACCTGGC                                 |
| FabIG93V-overlap-R                                        | GCCAGGTGCAAAAACAATAGAGTGTAC                                 |
| <i>Nde</i> I-Tt-F                                         | ggaattcCATATGAACCACCTTGGAAAAACGGAAG                         |
| <i>Hind</i> III-6*His-Tt-R                                | CGCAAGCTTCTAGTGATGGTGTGATGGTGTATGAACG<br>AAGAAGAGCTTTTCCC   |
| <i>Hind</i> III-TAA-TtV685-R                              | cccAAGCTTttaAACGAAGAAGAGCTTTTCCC                            |
| <i>Spe</i> I-Tt-R                                         | cggACTAGTCCGTGATGGTGTATG                                    |
| Tt-F <i>Sal</i> I                                         | gcGTCGACGGACCCGGGAGATC                                      |
| D478A overlap-F                                           | CCGTGGGCTTTGcCGCTGGCGGAA                                    |
| D478A overlap-R                                           | TTCCGCCAGCGgCAAAGCCCACGG                                    |
| D546A overlap-F                                           | CCTCCTTCGGGcCGGCCGTGTG                                      |
| D546A overlap-R                                           | CACACGGCCGgCCCGAAGGAGG                                      |
| Tt-R <i>Hind</i> III                                      | cgcAAGCTTCTAGTGATGGTGTGATGGTGTATG                           |
| A53E-F                                                    | AGGTGGCCCCGCCGGGAGGGGGGGC                                   |
| A53E-R                                                    | GCCCCCTCCCGGCCGGGCCACCT                                     |
| R59H-F                                                    | TCACGGTGCACATGGGAGACGGC                                     |
| R59H-R                                                    | GCCGTCTCCCATGTGCACCGTGA                                     |
| L75F-F                                                    | CCCCTGAGGTCCTGGTCTTTGAGGGCACCT                              |
| L75F-R                                                    | AAAGACCAGGACCTCAGGGGGCGACCAGGA                              |
| P97S-F                                                    | GGGAGGAGGTCTCTGGACCCCAAG                                    |
| P97S-R                                                    | CTTGGGGTCCAGAGACCTCCTCCC                                    |
| A113V-F                                                   | TTTCGGCCTTGGTCCGAAGGCTCC                                    |
| A113V-R                                                   | GGAGCCTTCGGACCAAGGCCGAAA                                    |
| L121P-F                                                   | CAGGAGCGCCCCAGGCGCCTCGAGGGG                                 |
| L121P-R                                                   | CCCCTCGAGGCGCCTGGGGCGCTCCTG                                 |
| V127D-F                                                   | CCTCGAGGGGGACTGGGTGGAG                                      |
| V127D-R                                                   | CTCCACCCAGTCCCCCTCGA                                        |
| Tt- <i>Sal</i> I-R                                        | CTCCCGGGTCCGTGACGCC                                         |
| G144R-F                                                   | GGGCCAGGTGGCGGGTGCTTG                                       |
| G144R-R                                                   | CAAGCACCCGCCACCTGGGCCC                                      |
| L148P-F                                                   | GGGCCCGGGTGGCGGGTGCCTGGGGGGGGCG                             |

---

|                |                                                  |
|----------------|--------------------------------------------------|
| L148P-R        | GGCACCCGCCACCCGGGCCCCCGGGCGTGC                   |
| G150R-F        | GCTTGGGAGGGCGGTCTTGGAC                           |
| G150R-R        | GTCCAAGACCGCCCTCCCAAGC                           |
| G150E-F        | GGGTGCTTGGGGAGGCGGTCTTGGA                        |
| G150E-R        | TCCAAGACCGCCTCCCCAAGCACCC                        |
| A151E-F        | CTTGGGGGGGTGGTCTTGGACCTT                         |
| A151E-R        | AAGGTCCAAGACCACCCCCCAAG                          |
| V167E-F        | CCTCCTGGAGGAGGACCCCGCTTAC                        |
| V167E-R        | GTAAGCGGGGTCTCTCTCCAGGAGGAA                      |
| A170P-F        | TCCTCCTGGAGGTGGACCCCCCTTACCGGATC                 |
| A170P-R        | GGGGGTCCACCTCCAGGAGGAACGCCCCCGAG                 |
| A178T-R        | TCCGTCGACGCCGCTCTTCCCAAGGCAAGGAGA<br>GGGTCAGGCTT |
| L189Q-F        | AAGGCCACCCTCAGCCCAAAC                            |
| L189Q-R        | GTTTGGGCTGAGGGTGGCCTT                            |
| I293F-F        | GCGTCGACGGACCCGGGAGTTCGCCAGCTG                   |
| I293F-R        | ACTCCCGGGTCCGTCGACGCCGCTCTTCCC                   |
| W296R-F        | GGCGTCGACGGACCCGGGAGATCGCCAGCCGGA<br>TCGGC       |
| I297N-F        | GGCGTCGACGGACCCGGGAGATCGCCAGCTGGA<br>ACGGC       |
| R427M-F        | TCTCCTCATGGAAGGCCTTCCCA                          |
| R427M-R        | TGGGAAGGCCTTCCATGAGGAGA                          |
| L430P-F        | TCAGGGAAGGCCATCCCAGCCAAA                         |
| L430P-R        | TTTGGCTGGGATGGCCTTCCCTGA                         |
| R486 overlap-F | GGAAGGGAGTCCTTTCACTTCGGG                         |
| R486overlap-R  | CCCGAAGTGAAAGGACTCCCTTCC                         |
| R545 overlap-F | CCTCCTCCTTCACGACGGCCGT                           |
| R545 overlap-R | CCCGAAGTGAAAGGACTCCCTTCC                         |
| L556P-F        | AGTTCGCCCCGGCCTTGGAGGCC                          |
| L556P-R        | GGCCTCCAAGGCCGGGGCGAACT                          |
| R651W-F        | TCGCCTTCCCCTGGCTTCCCGCT                          |
| R651W-R        | AGCGGGAAGCCAGGGGAAGGCGA                          |
| A659S-F        | CTTACCTGTCCGACCGCCTGGT                           |
| A659S-R        | ACCAGGCGGTCGGACAGGTGAAG                          |

---



Table S2. Error-prone PCR reaction system

| Reagent                 | Volume              |
|-------------------------|---------------------|
| Template DNA            | 50 ng               |
| 10x Taq buffer          | 5 $\mu$ l           |
| 100 mM dGTP             | 0.1 $\mu$ l         |
| 100 mM dATP             | 0.5 $\mu$ l         |
| 100 mM dTTP             | 0.5 $\mu$ l         |
| 100 mM dCTP             | 0.5 $\mu$ l         |
| Primer-F                | 1 $\mu$ l           |
| Primer-R                | 1 $\mu$ l           |
| 50 mM MgSO <sub>4</sub> | 0/1/2/3/4/5 $\mu$ l |
| 50 mM MnCl <sub>2</sub> | 0.5 $\mu$ l         |
| Taq enzyme              | 0.5 $\mu$ l         |
| ddH <sub>2</sub> O      |                     |
| $\Sigma$                | Up to 50 $\mu$ l    |
